# Supplementary material
Source: MDPI journal article supplement (https://www.mdpi.com/2673-6772/1/4/25)
Supplement: s1 [file s1]

# Supplementary file 1

## Questionnaire to be answered by each dog owner

Area: \_\_\_\_\_

Locality name or address: \_\_\_\_\_

Gender: \_\_\_\_\_

Age: \_\_\_\_\_

Main activity or profession: \_\_\_\_\_

| 1) Number of dogs at the place/<br>epidemiological unit (circle the<br>answer)                             | 1                                                                                                                                                                                                                                                                      | 2 | 3         | 4 | 5                                                                                                                                                                                                                                                                   | 6           | 7 | 8 | 9                                                                                                        | 10 | Other (write<br>the exact<br>number) |
|------------------------------------------------------------------------------------------------------------|------------------------------------------------------------------------------------------------------------------------------------------------------------------------------------------------------------------------------------------------------------------------|---|-----------|---|---------------------------------------------------------------------------------------------------------------------------------------------------------------------------------------------------------------------------------------------------------------------|-------------|---|---|----------------------------------------------------------------------------------------------------------|----|--------------------------------------|
| 2) Gender and age of the dogs                                                                              | Indicate how many male dogs of<br>each age shown below live in the<br>unit<br>>6 months to 1 year _____<br>2 years _____<br>3 years _____<br>4 years _____<br>5 years _____<br>6 years _____<br>7 years _____<br>8 years _____<br>9 years _____<br>10 years _____      |   |           |   | Indicate how many female dogs<br>of each age shown below live in<br>the unit<br>>6 months to 1 year _____<br>2 years _____<br>3 years _____<br>4 years _____<br>5 years _____<br>6 years _____<br>7 years _____<br>8 years _____<br>9 years _____<br>10 years _____ |             |   |   | Indicate how many dogs younger<br>than six months live in the<br>place/epidemiological unit              |    |                                      |
| 3) Number of dogs by size                                                                                  | a) Small _____                                                                                                                                                                                                                                                         |   |           |   | b) Medium _____                                                                                                                                                                                                                                                     |             |   |   | c) Large _____                                                                                           |    |                                      |
| 4) Origin of the dogs<br>(circle the correct answer)                                                       | a) Urban                                                                                                                                                                                                                                                               |   |           |   | b) Rural                                                                                                                                                                                                                                                            |             |   |   | c) Another country                                                                                       |    |                                      |
| 5) Only for female dogs<br>(circle the correct answer)                                                     | a) Female dog who had<br>puppies<br>Number of puppies in<br>the last litter _____                                                                                                                                                                                      |   | b) Spayed |   |                                                                                                                                                                                                                                                                     | c) Pregnant |   |   | d) Not spayed or does<br>not know                                                                        |    |                                      |
| 6) Do the dog (s) wear an ID collar or another method for identification (harness, tattoo, clothing, etc.) |                                                                                                                                                                                                                                                                        |   |           |   |                                                                                                                                                                                                                                                                     |             |   |   | Yes                                                                                                      |    | No                                   |
| 7) Does the dog spend time indoor?<br>(circle the correct answer)                                          | a) Permanently (all time inside the house)<br>b) Temporarily (the dog spends part of the day in the street or farm)<br>c) No (the dog is free at any time to be inside or outside)                                                                                     |   |           |   |                                                                                                                                                                                                                                                                     |             |   |   |                                                                                                          |    |                                      |
| 8) Reason to have a dog                                                                                    | a) Companion, affection, because children wanted a dog<br>b) Guarding the property<br>c) Work, hunting or sports<br>d) Breeding or commercial reasons<br>e) Compassion, the dog was abandoned and picked up from the streets or outdoor                                |   |           |   |                                                                                                                                                                                                                                                                     |             |   |   |                                                                                                          |    |                                      |
| 9) Type of food the dog receives<br>most of the time                                                       | a) Leftover from food for human consumption<br>b) Home-made especially prepared for the dog (i.e. bones, rice, etc.)<br>c) Commercial dry food for dogs<br>D) The dog is not fed by the owners, but the animal can find its food<br>E) The dog feeds from dead animals |   |           |   |                                                                                                                                                                                                                                                                     |             |   |   |                                                                                                          |    |                                      |
| 10) How often does the dog receive a<br>veterinary examination?                                            | a) Never<br>b) Only when the dog is sick or after an accident<br>c) Regularly at least once per year                                                                                                                                                                   |   |           |   |                                                                                                                                                                                                                                                                     |             |   |   |                                                                                                          |    |                                      |
| 11) How often is the dog been<br>dewormed?                                                                 | a) Never<br>b) Once in their lifetime<br>c) Regularly, at least once a year                                                                                                                                                                                            |   |           |   | 12) How often is the dog been<br>vaccinated?                                                                                                                                                                                                                        |             |   |   | a) Never been vaccinated<br>b) The last one was more than<br>one year ago<br>c) The dog has all required |    |                                      |

|                                                                           |                                                                                                    |                                     |                                                      |
|---------------------------------------------------------------------------|----------------------------------------------------------------------------------------------------|-------------------------------------|------------------------------------------------------|
|                                                                           |                                                                                                    |                                     | vaccines                                             |
| 13) Have you seen one or more wild dogs in the area?                      | Yes                                                                                                | No                                  | Does not know                                        |
| 14) If wild dogs are in the area, have they attacked livestock?           | Yes                                                                                                | No                                  | Does not know                                        |
| 15) Have you seen foxes in the area?                                      | Yes                                                                                                | No                                  | Does not know                                        |
| 16) If there are foxes in the area, do they attack livestock?             | Yes                                                                                                | No                                  | Does not know                                        |
| 17) Who is responsible for the free-roaming dogs? (person or institution) | a) Government Health department                                                                    | b) Animal Health Department (SAG)   | c) Municipality                                      |
|                                                                           | d) Community                                                                                       | e) All of the above (a, b, c and d) | f) Does not know                                     |
| 18) Cystic echinococcosis is a disease that develops in which species?    | a) Sheep                                                                                           | b) Dogs                             | c) Cattle                                            |
|                                                                           | d) Humans                                                                                          |                                     | e) All of the above                                  |
| 19) How does the dog acquire the parasite?                                | a) Because is not vaccinated                                                                       | b) Because it has not been dewormed | c) From free-roaming dogs                            |
|                                                                           | d) After eating offal from sheep or cattle                                                         |                                     | e) Does not know                                     |
| 20) How does the human acquire the parasite?                              | a) Because not washing hands often                                                                 |                                     | b) After ingestion of contaminated food or water     |
|                                                                           | c) After ingesting eggs in places contaminated with dog faeces (public squares, countryside, etc.) |                                     | d) All are correct                                   |
|                                                                           | e) All are incorrect                                                                               |                                     |                                                      |
| 21) Do you know someone diagnosed with cystic echinococcosis?             | Yes                                                                                                | No                                  | What is your relationship with that person?<br>_____ |
